32. Gaskell AL, Hight DF, Winders J, Tran G, Defresne A, Bonhomme V, Raz A, Sleigh JW, Sanders RD: Frontal alpha-delta EEG does not preclude volitional response during anaesthesia: Prospective cohort study of the isolated forearm technique. *Br J Anaesth* 2017; 119:664–73
33. McCarthy MM, Brown EN, Kopell N: Potential network mechanisms mediating electroencephalographic beta rhythm changes during propofol-induced paradoxical excitation. *J Neurosci* 2008; 28:13488–504
34. Thompson GJ, Pan WJ, Billings JC, Grooms JK, Shakil S, Jaeger D, Keilholz SD: Phase-amplitude coupling and infraslow (<1 Hz) frequencies in the rat brain: Relationship to resting state fMRI. *Front Integr Neurosci* 2014; 8:41
35. Blain-Moraes S, Lee U, Ku S, Noh G, Mashour GA: Electroencephalographic effects of ketamine on power, cross-frequency coupling, and connectivity in the alpha bandwidth. *Front Syst Neurosci* 2014; 8:114
36. Blain-Moraes S, Tarnal V, Vanini G, Alexander A, Rosen D, Shortal B, Janke E, Mashour GA: Neurophysiological correlates of sevoflurane-induced unconsciousness. *ANESTHESIOLOGY* 2015; 122:307–16
37. Dutta S, Lal R, Karol MD, Cohen T, Ebert T: Influence of cardiac output on dexmedetomidine pharmacokinetics. *J Pharm Sci* 2000; 89:519–27
38. Franks NP: General anaesthesia: From molecular targets to neuronal pathways of sleep and arousal. *Nat Rev Neurosci* 2008; 9:370–86

## ANESTHESIOLOGY REFLECTIONS FROM THE WOOD LIBRARY-MUSEUM

### From Benzene Rings to Political Ones: Metz and His Benzocaine, Anaesthesine

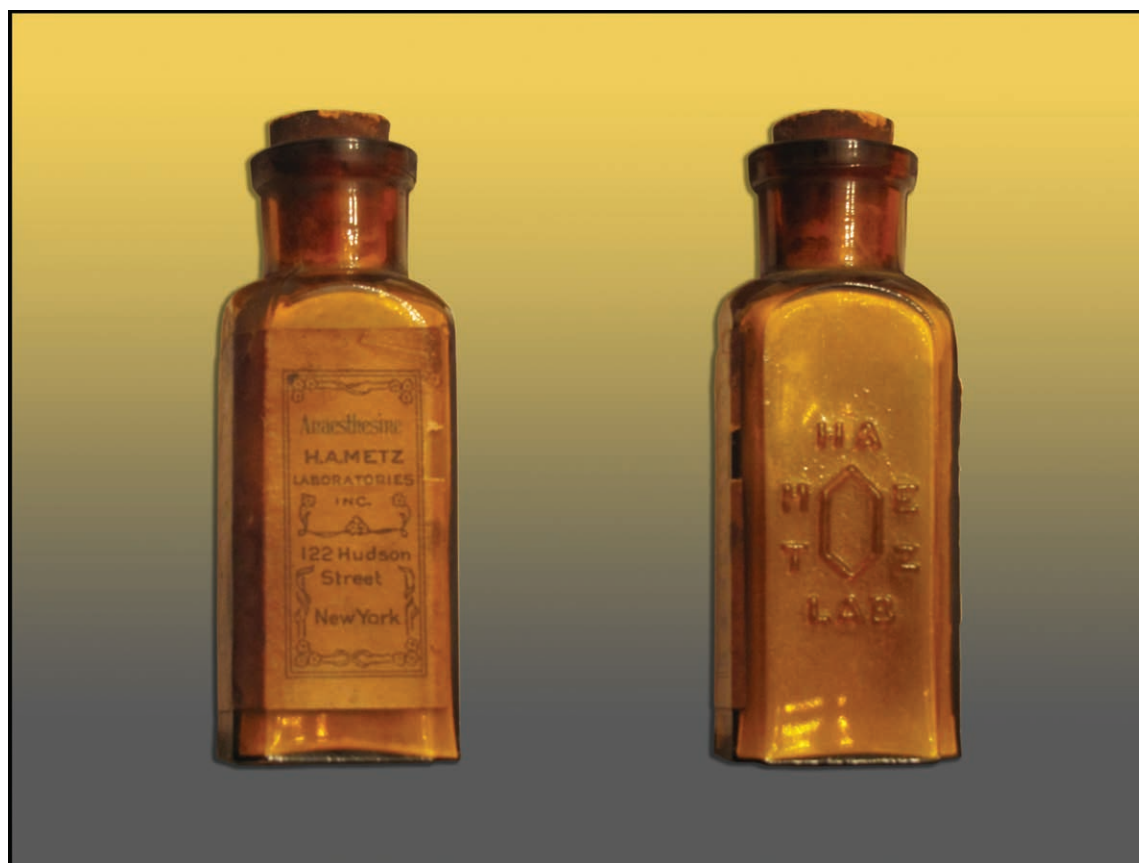

As a German-American born in New York, Herman August Metz (1867 to 1934) prospered as a manufacturer of pharmaceuticals and of dyestuffs. He produced a local anesthetic, benzocaine, the ethyl ester of para-aminobenzoic acid, which he trademarked as Anaesthesine (*left*). By embossing a benzene ring logo (*right*) on bottles of his numbing medicine, Metz hoped to frustrate competitors who might try to peddle a knock-off of his proprietary benzocaine. In the political ring, Metz frustrated Republicans by winning as a Democrat in the then largely Republican Tenth Congressional District of New York. As a Representative to the Sixty-third United States Congress (1913 to 1915), Metz favored neutrality toward Germany, a political position that fell out of favor with the start of World War I. (Copyright © the American Society of Anesthesiologists' Wood Library-Museum of Anesthesiology.)

*George S. Bause, M.D., M.P.H., Honorary Curator and Laureate of the History of Anesthesia, Wood Library-Museum of Anesthesiology, Schaumburg, Illinois, and Clinical Associate Professor, Case Western Reserve University, Cleveland, Ohio. UJYC@aol.com.*
